# Supplementary material for: Digital light processing (DLP) 3D-fabricated antimicrobial hydrogel with a sustainable resin of methacrylated woody polysaccharides and hybrid silver-lignin nanospheres
Source: Royal Society of Chemistry journal article supplement (doi:10.1039/d1gc03841a), 2022-01-01
Supplement: d1gc03841a1.pdf [file d1gc03841a1.pdf]

## Supporting Information

# Digital light processing (DLP) 3D-fabricated antimicrobial hydrogel with a sustainable resin of methacrylated woody polysaccharides and hybrid silver-lignin nanospheres

Luyao Wang,<sup>a</sup> Qingbo Wang,<sup>a</sup> Anna Slita,<sup>b</sup> Oskar Backman,<sup>a</sup> Zahra Gounani,<sup>c</sup> Emil Rosqvist,<sup>d</sup> Jouko Peltonen,<sup>d</sup>  
Stefan Willför,<sup>a</sup> Chunlin Xu,<sup>a</sup> Jessica M. Rosenholm,<sup>b</sup> and Xiaoju Wang <sup>\*a,b</sup>

**17 pages, 11 Figures, 9 Tables**

<sup>a</sup> Laboratory of Natural Materials Technology, Faculty of Science and Engineering, Åbo Akademi University, Henrikinkatu 2, Turku FI-20500, Finland

<sup>b</sup> Pharmaceutical Sciences Laboratory, Faculty of Science and Engineering, Åbo Akademi University, Tykistökatu 6A, Turku FI-20520, Finland

<sup>c</sup> Physics, Åbo Akademi University, Henrikinkatu 2, Turku FI-20500, Finland

<sup>d</sup> Laboratory of Molecular Science and Engineering, Faculty of Science and Engineering, Åbo Akademi University, Henrikinkatu 2, Turku FI-20500, Finland

\*Corresponding author email address: Xiaoju.Wang@abo.fi

## Characterizations

**Transmission electron microscopy (TEM):** The morphology of LNP and LNP@Ag were analyzed by a TEM microscope (JEM-1400 PLUS, JEOL Ltd., Japan) in bright-field mode with an accelerating voltage of 80 kV. A dispersion of LNP or LNP@Ag was prepared in distilled water at a concentration of 0.01 wt%, and 5  $\mu\text{L}$  of the dispersion was dropped onto a copper grid (200 mesh, TED PELLA INC. USA) coated with thin carbon film and then incubating at ambient temperature for 3 min. The excess liquid was removed by blotting with filter paper before loading in the TEM microscope. The average particle size of LNP and AgNPs was measured by imaging 150 - 200 particles from TEM images using Image J software.

**Hydrodynamic diameter and  $\zeta$ -potential analysis:** The intensity weighted average hydrodynamic diameter (Z-average), polydispersity index (PDI) by intensity, and surface charge ( $\zeta$ -potential) of the as-synthesized LNP and LNP@Ag were determined by using a Zetasizer Nano instrument (Malvern Instruments). The samples for dynamic light scattering (DLS) and  $\zeta$ -potential measurements were prepared in distilled water at a concentration of around 0.2  $\text{mg}\cdot\text{mL}^{-1}$  and analyzed at 25  $^{\circ}\text{C}$ . DLS measurement parameters were as follows: a Helium-Neon laser wavelength of 632.8 nm; a scattering angle of 173 $^{\circ}$ ; the refractive index (RI) and viscosity of the dispersant (distilled water) were set to be 1.324 and 0.887  $\times 10^{-3}$  pa.s, respectively; the RI and absorption value of the LNP@Ag were set to be 1.595 and 0.200 respectively, which were the same as those of LNP. The Z-average, PDI, and  $\zeta$ -potential values were collected through three consecutive measurements, for which the mean result was reported.

**FTIR analysis:** The infrared (IR) absorbance of the samples (i.e., LNP and LNP@Ag freeze-dried powders) were measured with a Fourier-transform infrared spectroscopy (FTIR) (Nicolet iS50 FT-IR Spectrometer, ThermoFisher Scientific<sup>TM</sup>) equipped with a standard sample compartment and a sample holder. All the samples for FTIR measurements were prepared by uniformly mixing 200 mg of potassium bromide (KBr) with 2 mg of sample in an agate mortar. Then the KBr/sample mixture was tableted and tested for FTIR analysis. Sixty-four scans for each sample were taken with a resolution of 4  $\text{cm}^{-1}$  ranging from 4000 to 400  $\text{cm}^{-1}$ .

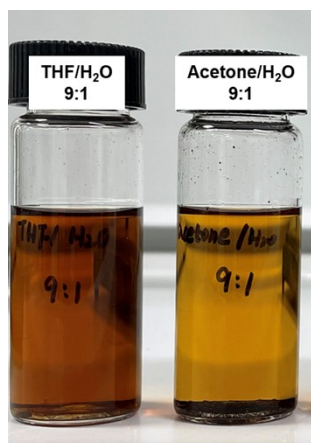

**Fig. S1** Solubility of laccase-polymerized MeOH-s fraction (incubated with laccase for 4 hours) in THF/H<sub>2</sub>O (9:1, v/v) and acetone/H<sub>2</sub>O (9:1, v/v). The image was taken after 1 day of dissolution.

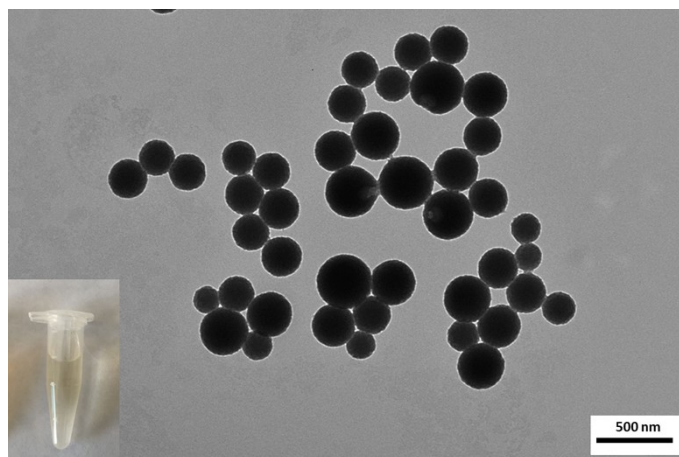

**Fig. S2** TEM image of *L-i*-PROH-LNP@Ag aqueous dispersion. The inset was the photograph of the LNP-[Ag(NH<sub>3</sub>)<sub>2</sub>]<sup>+</sup> aqueous dispersion over 4 hours reaction time.

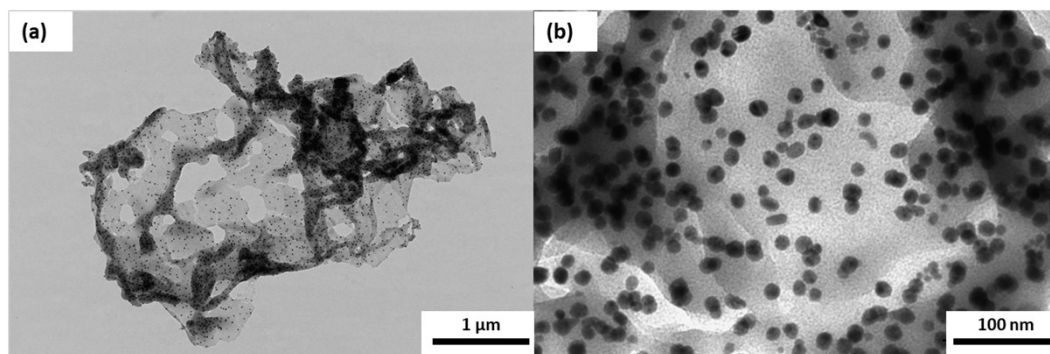

**Fig. S3** TEM images of MeOH-LNP@Ag used as a representative sample to show the deficient alkali resistance of lignin without polymerization but possess the capacity to reduce Ag<sup>+</sup>. The preparation process for MeOH-LNP@Ag was the same as LM-4-NP@Ag.

## XPS analysis of the LNP and LNP@Ag

The high-resolution XPS spectra of LNP and LNP@Ag are shown in **Fig. S4**. The detailed deconvolution of the core-level regions of C 1s and O 1s, including the band binding energies and relative area percentages were listed in **Table S3**. No significant binding energy shifts were found in the deconvoluted bands from C 1s and O 1s core-level regions after the incorporation of AgNPs, whereas the band area did change. Briefly, the relative area percentages of C<sub>2</sub> (C-O/C-OH) and O<sub>2</sub> (C-O-C/C-OH) in LM-4-NP@Ag decreased compared with the LM-4-NP sample. Meanwhile, the relative area percentages of C<sub>3</sub> (O-C-O/C=O), C<sub>4</sub> (O-C=O), and O<sub>1</sub> (C=O/C=O\*-O) concomitantly increased. These changes all indicate the oxidation of lignin hydroxyl groups to carbonyl/carboxyl groups during the silver reduction.

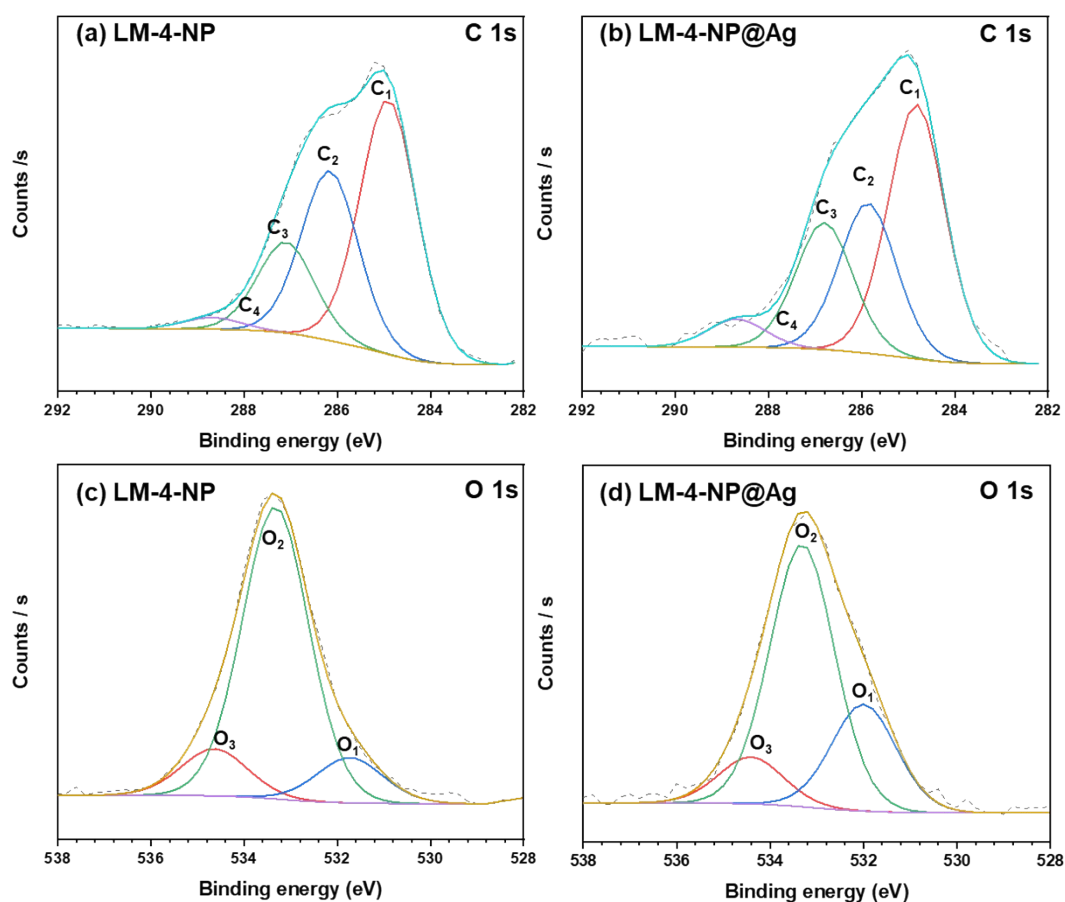

**Fig. S4** High-resolution XPS spectra over C 1s and O 1s core-level regions of the (a) (c) LNP and (b) (d) LNP@Ag from laccase-polymerized MeOH-s lignin.

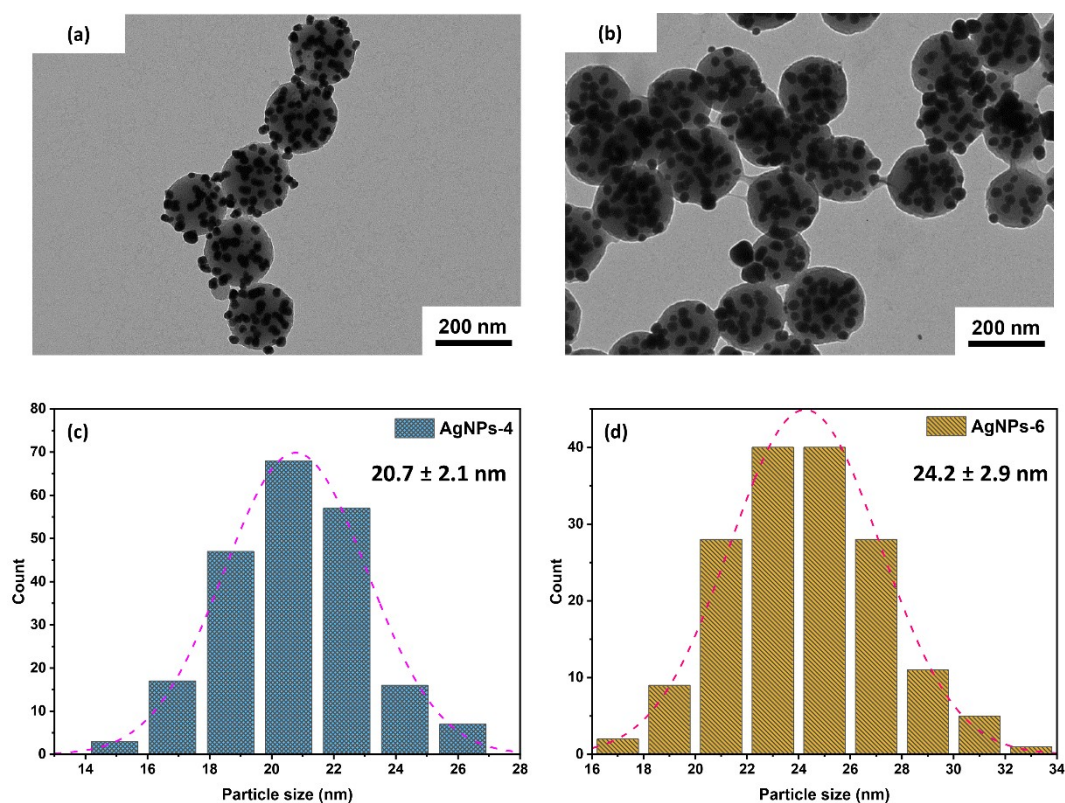

**Fig. S5** TEM images of LM-4-NPs@Ag that reacted with  $\text{Ag}(\text{NH}_3)_2\text{NO}_3$  ( $10 \text{ mg mL}^{-1}$ ) for (a) 4 hours and (b) 6 hours, and their corresponding histogram (c-d) of particle diameter size distribution of AgNPs. Note: The TEM magnification in (a) and (b) was  $40,000\times$ .

#### FTIR analysis of the LNP and LNP@Ag

To ascertain the oxidation of lignin by silver, the chemical composition of LM-4-NP and LM-4-NP@Ag were analyzed by FTIR spectroscopy. All the characteristic absorptions related to the aromatic skeleton of lignin were observed in LNP and LNP@Ag samples. In the carbonyl/carboxyl region of LM-4-NP@Ag, the peak at  $1720 \text{ cm}^{-1}$  belongs to the absorption of non-conjugated C=O stretching,<sup>1</sup> and the band intensity at  $1720 \text{ cm}^{-1}$  was obviously stronger than that of the original LM-4-NP. The C-H stretching vibration in aromatic methoxyl groups ( $-\text{OCH}_3$ ) and in methyl and methylene groups of lignin side chains was observed at  $2936 \text{ cm}^{-1}$  and  $2841 \text{ cm}^{-1}$  in LM-4-NP, which decreased in intensity in LM-4-NP@Ag. Furthermore, the sharp peak observed at  $1215 \text{ cm}^{-1}$  in LM-4-NP belongs to the syringyl (S) ring breathing with C-O stretching,<sup>2</sup> which shifted to a higher wavenumber in the FTIR spectrum of L-M-4-LNP@Ag. These results confirm the oxidation of lignin with the formation of carbonyl/carboxyl and quinone groups during the reaction with  $\text{Ag}(\text{NH}_3)_2\text{NO}_3$  solution. The above-mentioned changes were also observed in the FTIR spectrum of LB-4-NP/LB-4-NP@Ag and LE-4-NP/LE-4-NP@Ag samples. However, neither the peak position nor the peak intensity was changed for the LI-4-LNP sample after being incubated with  $\text{Ag}(\text{NH}_3)_2\text{NO}_3$  solution for 4 hours, which is in agreement with the chemical inert property of laccase-treated *i*-PrOH fraction.

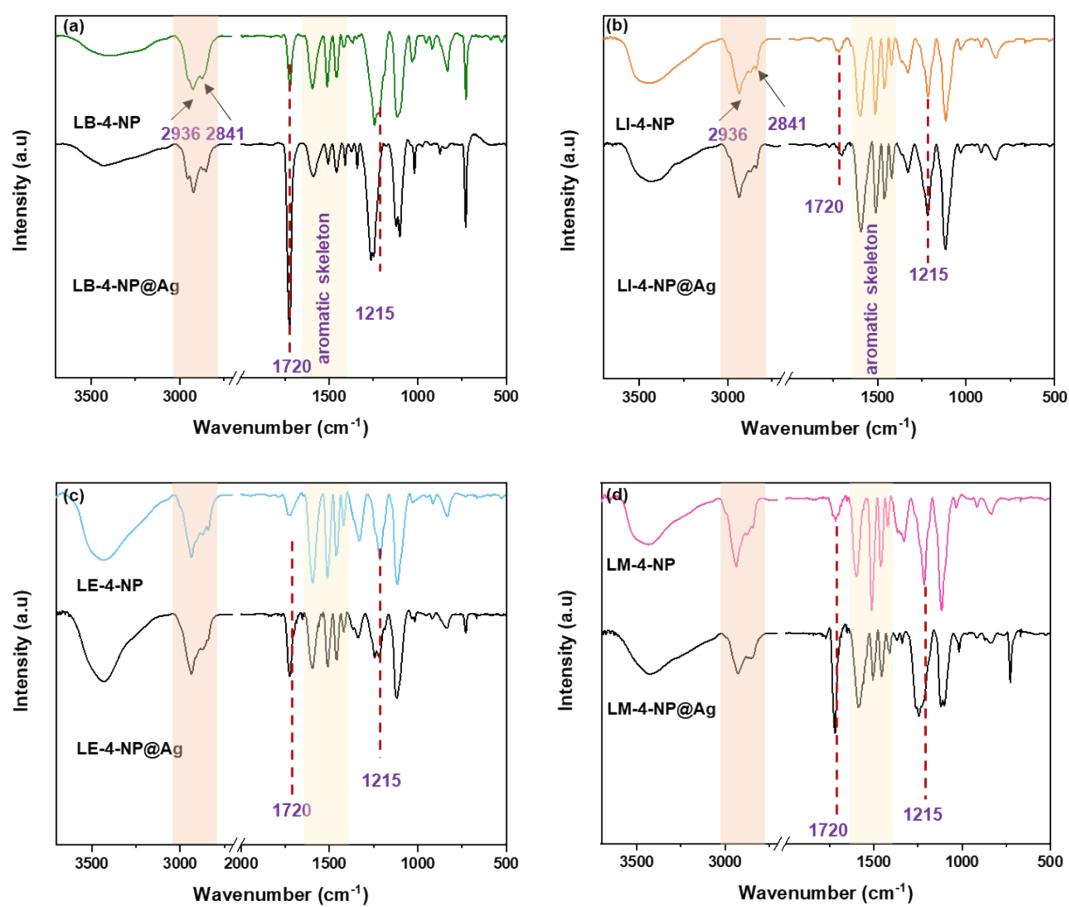

**Fig. S6** FTIR spectra of the LNP and LNP@Ag prepared from (a) laccase-polymerized birch AL lignin, (b) laccase-polymerized *i*-PrOH-s lignin, (c) laccase-polymerized EtOH-s lignin, and (d) laccase-polymerized MeOH-s lignin.

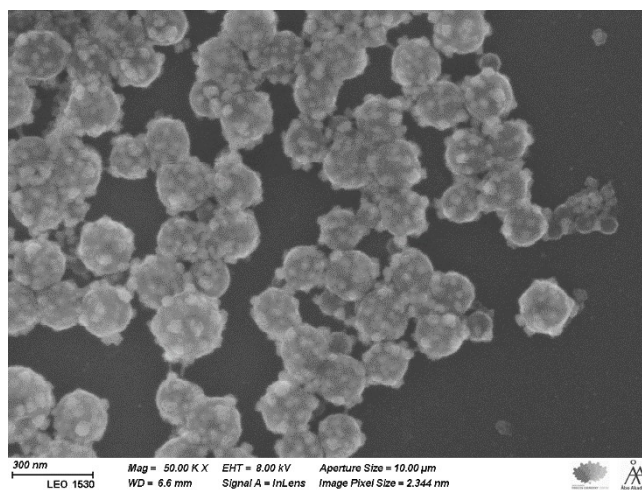

**Fig. S7** SEM image of LM-4-NP@Ag powder.

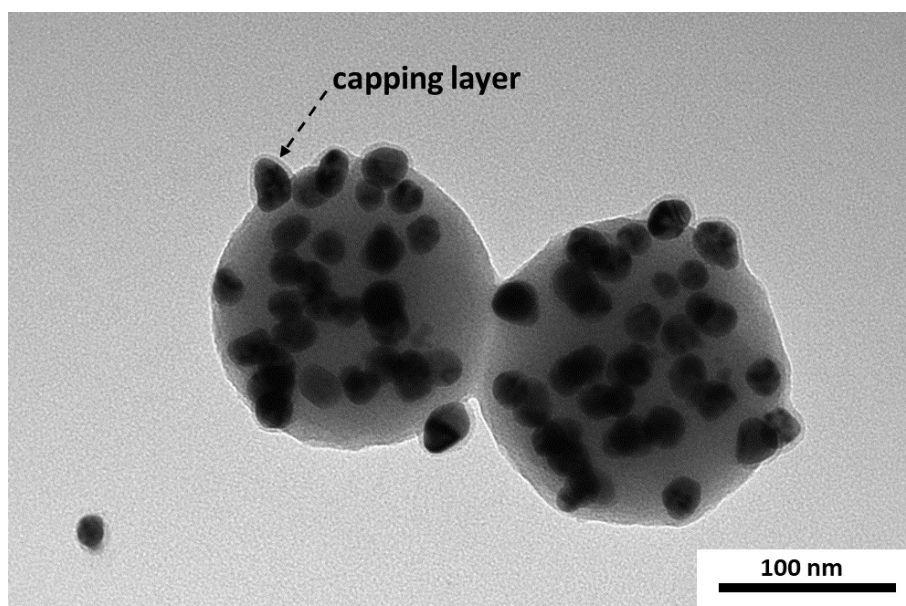

**Fig. S8** TEM image of LM-4-NP@Ag showing the presence of lignin capping layer.

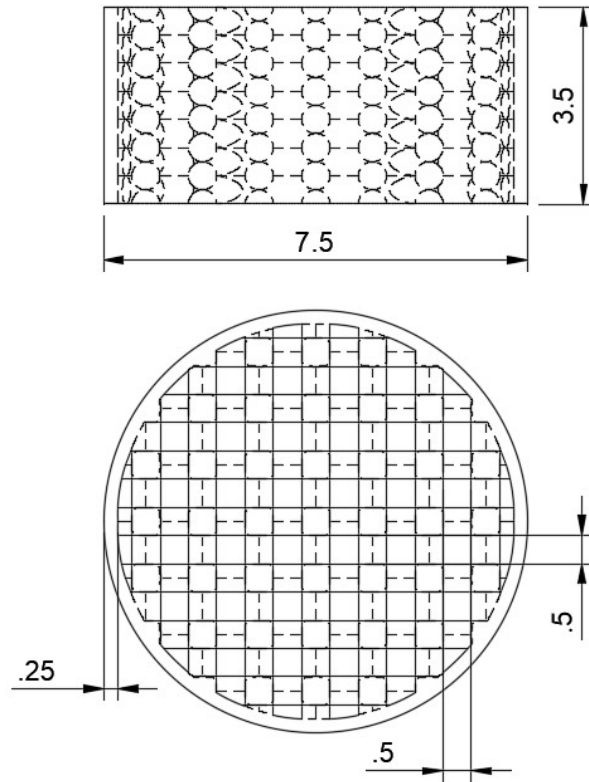

**Fig. S9** The CAD drawing of the crosshatch scaffolds.



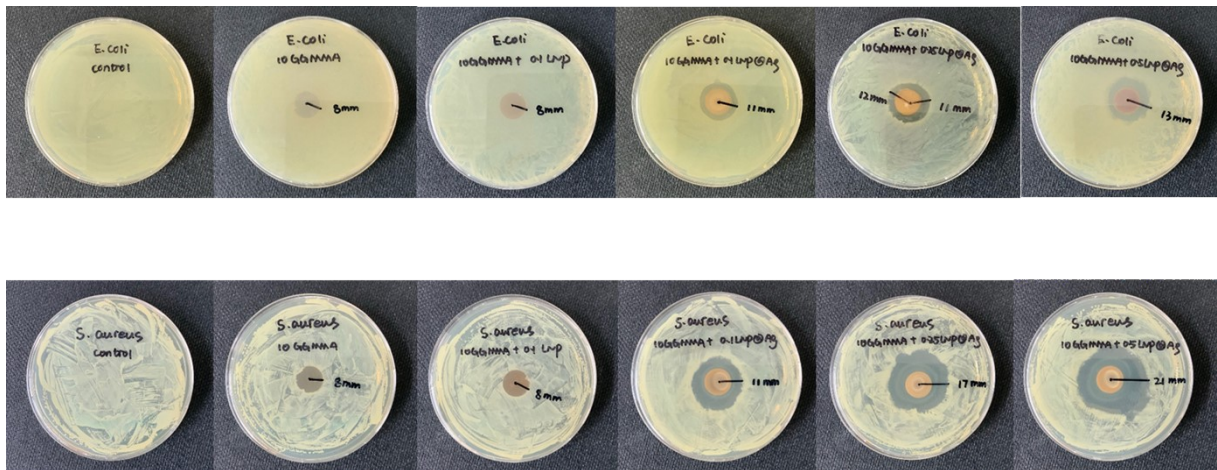

**Fig. S10** Inhibition zone in disk diffusion test using GGMAA-based hydrogel (16 mm in diameter, 1 mm in thickness) discs cast by UV<sub>405</sub>-LED.

## Mass balance analysis

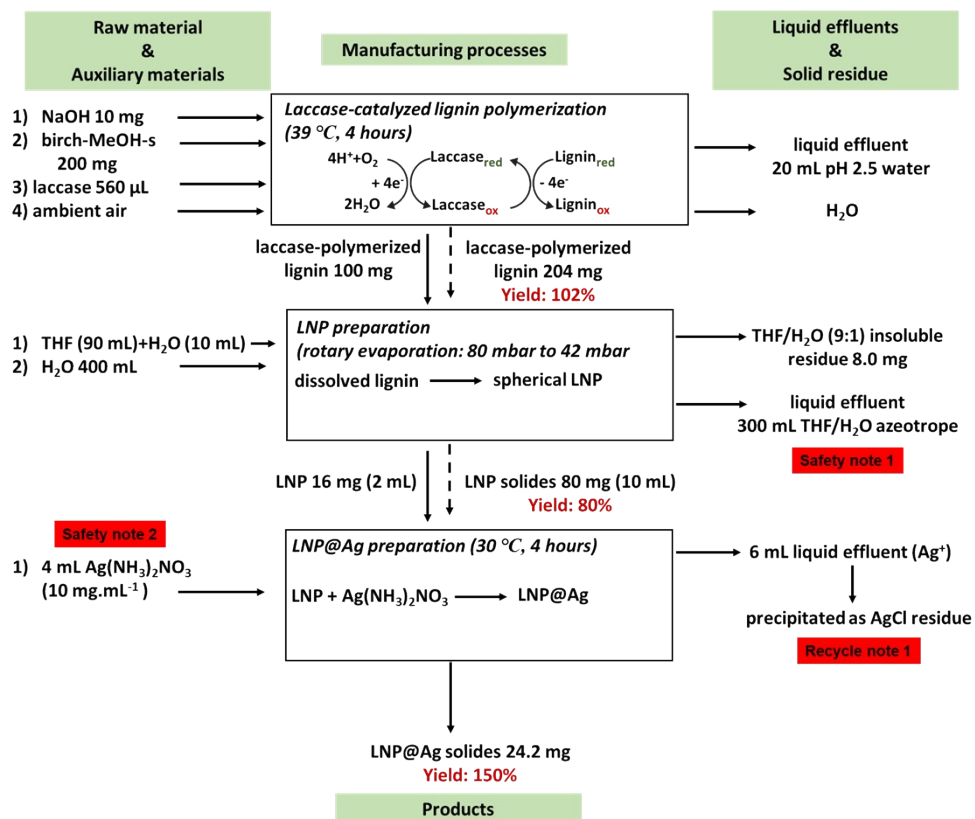

**Fig. S11** Mass balance analysis of the laccase-catalyzed lignin polymerization and LNP as well as LNP@Ag preparation processes using LM-4-NP@Ag sample as a representative case.

**Safety notes** were addressed to the deployment of THF as the solvent for the LNP production and fresh preparation of Ag(NH<sub>3</sub>)<sub>2</sub>NO<sub>3</sub> and a **recycle note** was created for the precipitation of the residual Ag<sup>+</sup> as AgCl at the end of *in situ* AgNP generation on LNP.

**Table S1.** DLS results of the LNPs prepared from birch-MeOH-s fraction and laccase-polymerized MeOH lignin in aqueous media.

| LNPs                 | hydrodynamic diameter <sup>a</sup> |       | dispersity <sup>a</sup> |       |
|----------------------|------------------------------------|-------|-------------------------|-------|
|                      | Z-average (nm)                     | STDEV | PDI                     | STDEV |
| MeOH-NP              | 417.8                              | 2.9   | 0.14                    | 0.05  |
| LM-1-NP <sup>b</sup> | 290.1                              | 5.0   | 0.15                    | 0.03  |
| LM-2-NP              | 242.1                              | 1.3   | 0.12                    | 0.04  |
| LM-3-NP              | 216.1                              | 2.5   | 0.12                    | 0.01  |
| LM-4-NP              | 167.0                              | 2.6   | 0.11                    | 0.01  |
| LM-5-NP              | 143.5                              | 1.0   | 0.24                    | 0.02  |
| LM-6-NP              | 117.9                              | 1.9   | 0.28                    | 0.02  |

<sup>a</sup>the results were obtained by calculating the average of three consecutive measurements. <sup>b</sup>LM-x-NP, x denotes the reaction time of lignin with laccase.

**Table S2.** UV-vis absorption bands and intensity of LM-4-NP@Ag dispersion in aqueous media.

| reaction time (min) | lignin absorption intensity |          | SPR bands        |                      | relative intensity |             |                |
|---------------------|-----------------------------|----------|------------------|----------------------|--------------------|-------------|----------------|
|                     | 289 nm                      | 295.8 nm | wavelength (nm)  | absorption intensity | 289 nm /295.8 nm   | SPR /289 nm | SPR / 295.8 nm |
| 90                  | 0.5518                      | 0.5569   | --- <sup>a</sup> | ---                  | 0.9908             | 0           | 0              |
| 100                 | 0.5408                      | 0.5488   | ---              | ---                  | 0.9853             | 0           | 0              |
| 120                 | 0.5488                      | 0.5573   | ---              | ---                  | 0.9848             | 0           | 0              |
| 150                 | 0.5511                      | 0.5539   | ---              | ---                  | 0.9950             | 0           | 0              |
| 160                 | 0.5864                      | 0.5866   | 360.8            | 0.4391               | 0.9998             | 0.7487      | 0.7486         |
| 170                 | 0.5944                      | 0.5968   | 365.8            | 0.4640               | 0.9959             | 0.7807      | 0.7775         |
| 180                 | 0.5981                      | 0.5975   | 375.4            | 0.4934               | 1.0010             | 0.8250      | 0.8258         |
| 190                 | 0.6273                      | 0.6300   | 400.8            | 0.5269               | 0.9957             | 0.8399      | 0.8363         |
| 200                 | 0.6123                      | 0.6102   | 410.6            | 0.5509               | 1.0034             | 0.8996      | 0.9027         |
| 220                 | 0.6366                      | 0.6316   | 418.6            | 0.6035               | 1.0080             | 0.9480      | 0.9556         |
| 230                 | 0.6389                      | 0.6377   | 420.2            | 0.6292               | 1.0019             | 0.9848      | 0.9867         |
| 240                 | 0.6352                      | 0.6315   | 424.0            | 0.6626               | 1.0058             | 1.0431      | 1.0492         |
| 250                 | 0.6532                      | 0.6503   | 425.8            | 0.6820               | 1.0045             | 1.0440      | 1.0487         |
| 260                 | 0.6537                      | 0.6480   | 426.2            | 0.7159               | 1.0088             | 1.0951      | 1.1048         |
| 270                 | 0.6606                      | 0.6575   | 427.4            | 0.7268               | 1.0046             | 1.1003      | 1.1054         |
| 280                 | 0.6753                      | 0.6675   | 428.4            | 0.7625               | 1.0116             | 1.1292      | 1.1423         |
| 290                 | 0.6836                      | 0.6798   | 429.2            | 0.7751               | 1.0056             | 1.1338      | 1.1401         |
| 310                 | 0.6772                      | 0.6683   | 430.8            | 0.7920               | 1.0133             | 1.1696      | 1.1852         |
| 320                 | 0.6867                      | 0.6816   | 430.8            | 0.8082               | 1.0074             | 1.1771      | 1.1858         |
| 330                 | 0.6954                      | 0.6852   | 430.8            | 0.8310               | 1.0114             | 1.1949      | 1.2127         |
| 340                 | 0.6772                      | 0.6696   | 430.2            | 0.8188               | 1.0149             | 1.2090      | 1.2228         |
| 350                 | 0.6917                      | 0.6817   | 431.4            | 0.8393               | 1.0147             | 1.2133      | 1.2311         |
| 360                 | 0.7093                      | 0.7043   | 431.4            | 0.8548               | 1.0071             | 1.2052      | 1.2137         |

<sup>a</sup>---, not detectable.

**Table S3.** Binding energies, XPS spectral deconvolution constraints, and area percent of the deconvoluted bands in each core-level region of the XPS spectra of LM-4-NP and LM-4-NP@Ag.

| core-level regions | bands                | LM-4-NP             |                  |                        |                  | LM-4-NP@Ag          |           |                        |          | band assignment <sup>b</sup> |
|--------------------|----------------------|---------------------|------------------|------------------------|------------------|---------------------|-----------|------------------------|----------|------------------------------|
|                    |                      | binding energy (eV) | FWHM (eV)        | L/G Mix (%)<br>Product | area (%)         | binding energy (eV) | FWHM (eV) | L/G Mix (%)<br>Product | area (%) |                              |
| <b>C 1s</b>        | C <sub>1</sub>       | 284.80              | 1.49             | 30                     | 48.3             | 284.86              | 1.50      | 30                     | 45.4     | C-C/C=C                      |
|                    | C <sub>2</sub>       | 286.16              | 1.49             | 30                     | 32.2             | 286.11              | 1.50      | 30                     | 26.8     | C-O/C-OH                     |
|                    | C <sub>3</sub>       | 287.10              | 1.49             | 30                     | 17.2             | 287.07              | 1.50      | 30                     | 22.7     | O-C-O/C=O                    |
|                    | C <sub>4</sub>       | 288.68              | 1.49             | 30                     | 2.2              | 288.87              | 1.50      | 30                     | 5.0      | O-C=O                        |
| <b>O 1s</b>        | O <sub>1</sub>       | 531.73              | 1.70             | 30                     | 11.8             | 531.99              | 1.70      | 30                     | 27.0     | C=O/C=O*-O                   |
|                    | O <sub>2</sub>       | 533.32              | 1.70             | 30                     | 76.0             | 533.31              | 1.70      | 30                     | 66.3     | C-O-C/C-OH                   |
|                    | O <sub>3</sub>       | 534.64              | 1.70             | 30                     | 12.2             | 534.41              | 1.70      | 30                     | 6.68     | C-O                          |
| <b>Ag 3d</b>       | Ag 3d <sub>3/2</sub> | --- <sup>a</sup>    | --- <sup>a</sup> | --- <sup>a</sup>       | --- <sup>a</sup> | 374.9               | 1.68      | 30                     | 40.0     | Ag 3d <sub>3/2</sub>         |
|                    | Ag 3d <sub>5/2</sub> | --- <sup>a</sup>    | --- <sup>a</sup> | --- <sup>a</sup>       | --- <sup>a</sup> | 368.8               | 1.68      | 30                     | 60.0     | Ag 3d <sub>5/2</sub>         |

<sup>a</sup>'---' denotes not detectable. <sup>b</sup>the deconvoluted bands were assigned by comparing with the published literature.<sup>3,4</sup>

## The calculation of lattice constant ( $a_0$ ) and average crystallite size ( $d$ ) of AgNP

The interplanar spacing ( $d_{hkl}$ ) and lattice constant ( $a_0$ ) of Ag cubic structure were calculated according to the Bragg's Law (equation (1)) and Miller indices (equation (2)), respectively.<sup>5</sup> In brief, the lattice plane reflections (hkl) = (111), (200), (220), (311) and (222), with the corresponding  $2\theta = 38.14^\circ, 44.18^\circ, 64.48^\circ, 77.35^\circ,$  and  $81.47^\circ$ , were used for the calculation of Ag lattice parameter (**Table S4**). The average of the five calculated values of  $a_0$  was compared with the standard  $a_0$  (4.0857 Å) of Ag cubic structure in **Table S4**.<sup>5</sup>

$$d_{hkl} = n\lambda / 2\sin\theta \quad (1)$$

$$a_0 = d_{hkl}\sqrt{h^2 + k^2 + l^2} \quad (2)$$

$d_{hkl}$  is the interplanar spacing, Å

$n$  is the order of the reflection (integer number), for first-order  $n=1$

$\lambda$  is the wavelength of the X-ray source, CuKa=1.54184 Å

$\theta$  is the Bragg angle in radians (rad)

$a_0$  is the lattice constant, Å

The average crystallite size ( $d$ ) of AgNP was calculated following the Scherrer formula (equation (3)),<sup>6,7</sup> which use the full width at half maximum (FWHM) of the major diffraction peak (111).

$$d = K\lambda / B\cos\theta \quad (3)$$

$d$  is the dimension of the crystallite, Å

$K$  is the numerical shape constant,  $K = 0.89$

$\lambda$  is the wavelength of the X-ray source, CuKa=1.54184 Å

$B$  is the corrected FWHM in radians (rad)

$\theta$  is the Bragg angle of the peak maximum in radians (rad)

**Table S4.** The lattice constant ( $a_0$ ) of AgNPs calculated from XRD data using the Bragg's Law and Miller indices and compared with the standard  $a_0$  of Ag.

| indices              |   |   | Bragg angle $\theta$ (rad) |                    | d-spacing ( $\text{\AA}$ ) | lattice constant ( $\text{\AA}$ ) | average $a_0$ ( $\text{\AA}$ ) | standard $a_0$ (JCPD card) | error (%) |
|----------------------|---|---|----------------------------|--------------------|----------------------------|-----------------------------------|--------------------------------|----------------------------|-----------|
| <b>LM-4-NP@Ag-3</b>  |   |   |                            |                    |                            |                                   |                                |                            |           |
| h                    | k | l | $\theta$                   | $\text{Sin}\theta$ | $d_{hkl}$                  | $a_0$                             | $a_0$                          | $a_0$                      | $a_0$     |
| 1                    | 1 | 1 | 0.3328                     | 0.3267             | 2.3597                     | 4.0870                            |                                |                            |           |
| 2                    | 0 | 0 | 0.3855                     | 0.3760             | 2.0503                     | 4.1006                            |                                |                            |           |
| 2                    | 2 | 0 | 0.5627                     | 0.5334             | 1.4453                     | 4.0873                            | 4.0910                         | 4.0857                     | 0.13      |
| 3                    | 1 | 1 | 0.6750                     | 0.6249             | 1.2337                     | 4.0916                            |                                |                            |           |
| 2                    | 2 | 2 | 0.7110                     | 0.6526             | 1.1813                     | 4.0885                            |                                |                            |           |
| <b>LM-4-NP@Ag-5</b>  |   |   |                            |                    |                            |                                   |                                |                            |           |
| h                    | k | l | $\theta$                   | $\text{Sin}\theta$ | $d_{hkl}$                  | $a_0$                             | $a_0$                          | $a_0$                      | $a_0$     |
| 1                    | 1 | 1 | 0.3326                     | 0.3265             | 2.3612                     | 4.0895                            |                                |                            |           |
| 2                    | 0 | 0 | 0.3853                     | 0.3758             | 2.0514                     | 4.1028                            |                                |                            |           |
| 2                    | 2 | 0 | 0.5626                     | 0.5334             | 1.4453                     | 4.0873                            | 4.0920                         | 4.0857                     | 0.15      |
| 3                    | 1 | 1 | 0.6750                     | 0.6249             | 1.2337                     | 4.0916                            |                                |                            |           |
| 2                    | 2 | 2 | 0.7110                     | 0.6526             | 1.1813                     | 4.0885                            |                                |                            |           |
| <b>LM-4-NP@Ag-10</b> |   |   |                            |                    |                            |                                   |                                |                            |           |
| h                    | k | l | $\theta$                   | $\text{Sin}\theta$ | $d_{hkl}$                  | $a_0$                             | $a_0$                          | $a_0$                      | $a_0$     |
| 1                    | 1 | 1 | 0.3328                     | 0.3267             | 2.3597                     | 4.0870                            |                                |                            |           |
| 2                    | 0 | 0 | 0.3854                     | 0.3759             | 2.0509                     | 4.1017                            |                                |                            |           |
| 2                    | 2 | 0 | 0.5630                     | 0.5337             | 1.4445                     | 4.0850                            | 4.0900                         | 4.0857                     | 0.10      |
| 3                    | 1 | 1 | 0.6757                     | 0.6254             | 1.2327                     | 4.0883                            |                                |                            |           |
| 2                    | 2 | 2 | 0.7112                     | 0.6527             | 1.1811                     | 4.0879                            |                                |                            |           |

**Table S5.** Comparison of particle size of AgNPs measured from TEM and crystallite size ( $d$ ) of Ag calculated from XRD pattern using Scherrer formula.

| samples       | XRD     |              |        | TEM                |
|---------------|---------|--------------|--------|--------------------|
|               | B (rad) | Cos $\theta$ | d (nm) | particle size (nm) |
| LM-4-NP@Ag-3  | 0.041   | 0.9451       | 3.5    | 8.1 $\pm$ 1.2      |
| LM-4-NP@Ag-5  | 0.039   | 0.9452       | 3.7    | 16.1 $\pm$ 1.9     |
| LM-4-NP@Ag-10 | 0.036   | 0.9451       | 4.0    | 20.7 $\pm$ 2.1     |

**Table S6.** The XPS results in atomic%.

| sample     | C 1s | O 1s | Ag 3d |
|------------|------|------|-------|
| LM-4-NP    | 77.9 | 22.1 | 0     |
| LM-4-NP@Ag | 75.1 | 21.5 | 3.4   |

**Table S7** Mass-based metrics for evaluating "greenness" in LNP@Ag preparation.

| samples        | mass input (mg)  |                                                                | reaction time (hours) | product (mg) |        | waste (mg) | mass-based metrics                        |                       |
|----------------|------------------|----------------------------------------------------------------|-----------------------|--------------|--------|------------|-------------------------------------------|-----------------------|
|                | LNP <sup>a</sup> | Ag(NH <sub>3</sub> ) <sub>2</sub> NO <sub>3</sub> <sup>b</sup> |                       | LNP@Ag       | LNP@Ag |            | reaction mass efficiency <sup>e</sup> (%) | E factor <sup>f</sup> |
| LM-4-NP@Ag-3   | 16               | 12                                                             | 4                     | 17.4         | 109    | 7.4        | 62                                        | 0.42                  |
| LM-4-NP@Ag-5   | 16               | 20                                                             | 4                     | 23.0         | 143    | 9.8        | 64                                        | 0.43                  |
| LM-4-NP@Ag-10  | 16               | 40                                                             | 4                     | 24.2         | 150    | 28.6       | 43                                        | 1.18                  |
| LM-4-NP@Ag-10* | 16               | 40                                                             | 6                     | 23.0         | 144    | 29.8       | 41                                        | 1.29                  |

<sup>a</sup>2 mL LNP dispersion; <sup>b</sup>4 mL Ag(NH<sub>3</sub>)<sub>2</sub>NO<sub>3</sub> solution, ignore the weight of NH<sub>3</sub>.H<sub>2</sub>O; <sup>c</sup>yield (%) = 100 x m<sub>(LNP@Ag)</sub> (recovered by centrifugation and freeze-drying) / m<sub>(LNP)</sub> fed initially;

<sup>d</sup>waste Ag(NH<sub>3</sub>)<sub>2</sub>NO<sub>3</sub> = mass input Ag(NH<sub>3</sub>)<sub>2</sub>NO<sub>3</sub> – (mass of Ag<sup>+</sup> reduced to metallic Ag), ignore the weight of NH<sub>3</sub>.H<sub>2</sub>O

<sup>e</sup>reaction mass efficiency = 100 x mass of product (LNP@Ag) / mass of total input

<sup>f</sup>E(nvironmental) factor = total waste/mass of product (LNP@Ag)

**Table S8.** Comparison of the antimicrobial activity of as-prepared GGMA/LNP@Ag hydrogel with other hydrogel or film that engaged lignin-capped AgNPs as the antimicrobial component.

| materials                                      | loading of [lignin-Ag]-based sample (wt%) | antibacterial testing  |                  | bactericidal ratio (%) |                |                  |                       |                         | Ref.      |
|------------------------------------------------|-------------------------------------------|------------------------|------------------|------------------------|----------------|------------------|-----------------------|-------------------------|-----------|
|                                                |                                           | testing approach       | testing time (h) | <i>P. aeruginosa</i>   | <i>E. coli</i> | <i>S. aureus</i> | <i>S. epidermidis</i> | <i>L. monocytogenes</i> |           |
| GGMA-LNP@Ag hydrogel                           | 0.10                                      |                        | 4                | ---                    | 99             | 99               | ---                   | ---                     | this work |
| polyurethane-[lignin-AgNP] foam                | 0.12                                      | colony-counting method | 24               | 99                     | ---            | 90               | ---                   | ---                     | 8         |
| poly(vinyl alcohol)-[lignin-AgNP] hydrogel     | 14                                        |                        | 24               | ---                    | 99             | 99               | ---                   | ---                     | 9         |
| poly(lactide)-[lignin-AgNP] film               | 1.00                                      |                        | 3                | ---                    | 100            | ---              | ---                   | 99                      | 10        |
| polyacrylic acid-pectin-[lignin-AgNP] hydrogel | > 0.08                                    | optical density        | 24               | ---                    | 97             | ---              | 98                    | ---                     | 11        |
| agar-[lignin-AgNP] film                        | 1.00                                      |                        | 3                | ---                    | 99             | ---              | ---                   | 37 (6 h, 99%)           | 12        |

<sup>a</sup>'---' the strain was not included in the antimicrobial experiment.

**Table S9.** The yield of laccase-polymerized lignin from birch AL fractions and LNP as well as LNP@Ag yield obtained from laccase-polymerized lignin.

| lignin fractions        | laccase-catalyzed polymerization |                      |                        | LNP preparation     |                         |          |                        | LNP@Ag preparation <sup>c</sup> |                      |                        |
|-------------------------|----------------------------------|----------------------|------------------------|---------------------|-------------------------|----------|------------------------|---------------------------------|----------------------|------------------------|
|                         | initial weight (mg)              | isolated weight (mg) | yield <sup>a</sup> (%) | initial weight (mg) | insoluble fraction (mg) | LNP (mg) | yield <sup>b</sup> (%) | initial weight (mg)             | LNP@Ag obtained (mg) | yield <sup>d</sup> (%) |
| birch AL                | 210                              | 218                  | 109                    | 100                 | 9                       | 82       | 82                     | 16                              | 20                   | 126                    |
| birch- <i>i</i> -PrOH-s | 209                              | 205                  | 102                    | 100                 | 9                       | 79       | 79                     | 16                              | 14                   | 88                     |
| birch-EtOH-s            | 205                              | 208                  | 102                    | 100                 | 2                       | 71       | 71                     | 16                              | 18                   | 112                    |
| birch-MeOH-s            | 200                              | 204                  | 102                    | 100                 | 8                       | 81       | 81                     | 16                              | 24                   | 150                    |

<sup>a</sup>calculated after 4 hours incubation with laccase, yield (%) =  $100 \times m_{(\text{laccase-polymerized lignin})} / m_{(\text{lignin fraction})}$  (recovered by acid precipitation, centrifugation, and freeze-drying) /  $m_{(\text{lignin fraction})}$  fed initially

<sup>b</sup>yield (%) =  $100 \times m_{(\text{LNP})} / m_{(\text{laccase-polymerized lignin})}$  (recovered by centrifugation and freeze-drying) /  $m_{(\text{laccase-polymerized lignin})}$  fed initially

<sup>c</sup>the LNP@Ag was prepared by impregnating LNP in  $\text{Ag}(\text{NH}_3)_2\text{NO}_3$  solution ( $10 \text{ mg}\cdot\text{mL}^{-1}$ ) for 4 hours

<sup>d</sup>yield (%) =  $100 \times m_{(\text{LNP@Ag})} / m_{(\text{LNP})}$  (recovered by centrifugation and freeze-drying) /  $m_{(\text{LNP})}$  fed initially



## References

- 1 S. Piqueras, S. Füchtner, R. Rocha de Oliveira, A. Gómez-Sánchez, S. Jelavić, T. Keplinger, A. de Juan and L. G. Thygesen, *Front. Plant Sci.*, 2020, **10**, 1–15.
- 2 C. G. Boeriu, D. Bravo, R. J. A. Gosselink and J. E. G. Van Dam, *Ind. Crops Prod.*, 2004, **20**, 205–218.
- 3 L. Zhang, H. Lu, J. Chu, J. Ma, Y. Fan, Z. Wang and Y. Ni, *ACS Sustain. Chem. Eng.*, 2020, **8**, 12655–12663.
- 4 Z. Tian, L. Zong, R. Niu, X. Wang, Y. Li and S. Ai, *J. Appl. Polym. Sci.*, 2015, **132**, 42057.
- 5 B. K. Mehta, M. Chhajlani and B. D. Shrivastava, *J. Phys. Conf. Ser.*, 2017, **836**, 012050.
- 6 K. He, N. Chen, C. Wang, L. Wei and J. Chen, *Cryst. Res. Technol.*, 2018, **53**, 1–6.
- 7 S. Chen, G. Wang, W. Sui, A. M. Parvez and C. Si, *Green Chem.*, 2020, **22**, 2879–2888.
- 8 A. G. Morena, I. Stefanov, K. Ivanova, S. Pérez-Rafael, M. Sánchez-Soto and T. Tzanov, *Ind. Eng. Chem. Res.*, 2020, **59**, 4504–4514.
- 9 M. Li, X. Jiang, D. Wang, Z. Xu and M. Yang, *Colloids Surf. B: Biointerfaces*, 2019, **177**, 370–376.
- 10 S. Shankar, J. W. Rhim and K. Won, *Int. J. Biol. Macromol.*, 2018, **107**, 1724–1731.
- 11 D. Gan, W. Xing, L. Jiang, J. Fang, C. Zhao, F. Ren, L. Fang, K. Wang and X. Lu, *Nat. Commun.*, 2019, **10**, 1–10.
- 12 S. Shankar and J. W. Rhim, *Food Hydrocoll.*, 2017, **71**, 76–84.
